# Supplementary material for: Complete Mitochondrial Genome and Phylogenetic Analysis of Tarsiger indicus (Aves: Passeriformes: Muscicapidae)
Source: MDPI journal article supplement (doi:10.3390/genes15010090), 2024-01-11
Supplement: s1 [file s1]

Article

# Complete Mitochondrial Genome and Phylogenetic Analysis of *Tarsiger indicus* (Aves: Passeriformes: Muscicapidae)

Guanwei Lan <sup>1,2,†</sup>, Jiaojiao Yu <sup>2,†</sup>, Juan Liu <sup>3</sup>, Yue Zhang <sup>3</sup>, Rui Ma <sup>2</sup>, Yanshan Zhou <sup>2</sup>, Biqing Zhu <sup>3</sup>, Wei Wei <sup>1</sup>, Jiabin Liu <sup>2,4,\*</sup> and Guilan Qi <sup>5,\*</sup>

<sup>1</sup> Key Laboratory of Southwest China Wildlife Resources Conservation (Ministry of Education), China West Normal University, Nanchong 637009, China;

<sup>2</sup> Sichuan Key Laboratory of Conservation Biology for Endangered Wildlife, Chengdu Research Base of Giant Panda Breeding, Chengdu 610081, China;

<sup>3</sup> Administrative Bureau of Baihe National Nature Reserve, Ngawa 623400, China;

<sup>4</sup> Institute of Wildlife Conservation, Central South University of Forestry and Technology, Changsha 410004, China

<sup>5</sup> Animal husbandry institute, Chengdu Academy of Agriculture and Forestry Sciences, Chengdu 611130, China

\* Correspondence: jiabin\_liu2013@126.com (J.L.); qidunwu@163.com (G.Q.)

† These authors contributed equally to this work.

## Supplementary Materials

Table S1: The partition and best-fit partition models used in this study;

Table S2: The codon usage in the mitogenomes of *T. indicus* and *T. cyanurus*;

Table S3: The nucleotide composition and skew in the mitogenomes of 25 species of Muscicapidae;

Figure S1: The phylogenetic relationships of Passeriformes inferred by BI method based on the 13PCGs+2rRNAs dataset. Numbers on nodes are the Bayesian posterior probabilities.

**Table S1.** The partition and best-fit partition models used in this study.

| Phylogenetic analysis | Charset                       | Partition                                       | Model        |
|-----------------------|-------------------------------|-------------------------------------------------|--------------|
| ML                    | <i>ATP6_ATP8_COX2_ND3_ND4</i> | 1-681, 682-846, 2395-3075, 7012-7356, 7357-8733 | GTR+F+I+R4   |
|                       | <i>COX1</i>                   | 847-2394                                        | TIM2+F+I+R4  |
|                       | <i>COX3_Cytb_ND4L_ND5</i>     | 3076-3858, 3859-4998, 8734-9027, 9028-10842     | GTR+F+I+R4   |
|                       | <i>ND1</i>                    | 4999-5973                                       | TVM+F+I+R4   |
|                       | <i>ND2</i>                    | 5974-7011                                       | TIM+F+R4     |
|                       | <i>ND6</i>                    | 10843-11358                                     | TPM2u+F+I+G4 |
|                       | <i>rrnL_rrnS</i>              | 11359-12923, 12924-13893                        | GTR+F+I+R3   |
| BI                    | <i>ATP6_ATP8_COX2_ND3_ND4</i> | 1-681, 682-846, 2395-3075, 7012-7356, 7357-8733 | GTR+F+I+G4   |
|                       | <i>COX1</i>                   | 847-2394                                        | GTR+F+I+G4   |
|                       | <i>COX3_Cytb_ND4L_ND5</i>     | 3076-3858, 3859-4998, 8734-9027, 9028-10842     | GTR+F+I+G4   |
|                       | <i>ND1</i>                    | 4999-5973                                       | GTR+F+I+G4   |
|                       | <i>ND2</i>                    | 5974-7011                                       | GTR+F+I+G4   |
|                       | <i>ND6</i>                    | 10843-11358                                     | HKY+F+I+G4   |
|                       | <i>rrnL_rrnS</i>              | 11359-12923, 12924-13893                        | GTR+F+I+G4   |

**Table S2.** The codon usage in the mitogenomes of *T. indicus* and *T. cyanurus*.

| Code table                                                                             |                   | Vertebrate Mitochondrial                                               |        |                   |                    |
|----------------------------------------------------------------------------------------|-------------------|------------------------------------------------------------------------|--------|-------------------|--------------------|
| Sequences used                                                                         |                   | 2: <i>Tarsiger indicus</i> OR459825, <i>Tarsiger cyanurus</i> KF997864 |        |                   |                    |
| Codon                                                                                  | <i>T. indicus</i> | <i>T. cyanurus</i>                                                     | Codon  | <i>T. indicus</i> | <i>T. cyanurus</i> |
| UUU(F)                                                                                 | 38 (0.35)         | 34 (0.31)                                                              | UAU(Y) | 16 (0.29)         | 19 (0.36)          |
| UUC(F)                                                                                 | 181 (1.65)        | 187 (1.69)                                                             | UAC(Y) | 94 (1.71)         | 88 (1.64)          |
| UUA(L)                                                                                 | 32 (0.29)         | 42 (0.38)                                                              | UAA(*) | 6 (2.40)          | 6 (2.40)           |
| UUG(L)                                                                                 | 11 (0.10)         | 16 (0.15)                                                              | UAG(*) | 1 (0.40)          | 0 (0.00)           |
| CUU(L)                                                                                 | 56 (0.51)         | 60 (0.55)                                                              | CAU(H) | 11 (0.21)         | 14 (0.27)          |
| CUC(L)                                                                                 | 160 (1.45)        | 152 (1.39)                                                             | CAC(H) | 92 (1.79)         | 90 (1.73)          |
| CUA(L)                                                                                 | 347 (3.14)        | 339 (3.09)                                                             | CAA(Q) | 95 (1.86)         | 92 (1.82)          |
| CUG(L)                                                                                 | 58 (0.52)         | 49 (0.45)                                                              | CAG(Q) | 7 (0.14)          | 9 (0.18)           |
| AUU(I)                                                                                 | 69 (0.48)         | 72 (0.48)                                                              | AAU(N) | 17 (0.27)         | 15 (0.23)          |
| AUC(I)                                                                                 | 217 (1.52)        | 229 (1.52)                                                             | AAC(N) | 109 (1.73)        | 115 (1.77)         |
| AUA(M)                                                                                 | 105 (1.35)        | 126 (1.58)                                                             | AAA(K) | 83 (1.91)         | 80 (1.90)          |
| AUG(M)                                                                                 | 50 (0.65)         | 33 (0.42)                                                              | AAG(K) | 4 (0.09)          | 4 (0.10)           |
| GUU(V)                                                                                 | 30 (0.62)         | 32 (0.70)                                                              | GAU(D) | 13 (0.39)         | 10 (0.29)          |
| GUC(V)                                                                                 | 70 (1.45)         | 63 (1.37)                                                              | GAC(D) | 53 (1.61)         | 59 (1.71)          |
| GUA(V)                                                                                 | 69 (1.43)         | 68 (1.48)                                                              | GAA(E) | 73 (1.62)         | 73 (1.64)          |
| GUG(V)                                                                                 | 24 (0.50)         | 21 (0.46)                                                              | GAG(E) | 17 (0.38)         | 16 (0.36)          |
| UCU(S)                                                                                 | 34 (0.73)         | 31 (0.66)                                                              | UGU(C) | 6 (0.38)          | 4 (0.24)           |
| UCC(S)                                                                                 | 96 (2.06)         | 103 (2.19)                                                             | UGC(C) | 26 (1.63)         | 30 (1.76)          |
| UCA(S)                                                                                 | 82 (1.76)         | 86 (1.83)                                                              | UGA(W) | 98 (1.83)         | 99 (1.85)          |
| UCG(S)                                                                                 | 8 (0.17)          | 5 (0.11)                                                               | UGG(W) | 9 (0.17)          | 8 (0.15)           |
| CCU(P)                                                                                 | 33 (0.59)         | 34 (0.62)                                                              | CGU(R) | 7 (0.40)          | 7 (0.39)           |
| CCC(P)                                                                                 | 88 (1.58)         | 76 (1.38)                                                              | CGC(R) | 18 (1.03)         | 18 (1.01)          |
| CCA(P)                                                                                 | 91 (1.63)         | 109 (1.97)                                                             | CGA(R) | 41 (2.34)         | 43 (2.42)          |
| CCG(P)                                                                                 | 11 (0.20)         | 2 (0.04)                                                               | CGG(R) | 4 (0.23)          | 3 (0.17)           |
| ACU(T)                                                                                 | 34 (0.42)         | 42 (0.53)                                                              | AGU(S) | 6 (0.13)          | 9 (0.19)           |
| ACC(T)                                                                                 | 167 (2.04)        | 151 (1.91)                                                             | AGC(S) | 54 (1.16)         | 48 (1.02)          |
| ACA(T)                                                                                 | 120 (1.47)        | 120 (1.51)                                                             | AGA(*) | 2 (0.80)          | 2 (0.80)           |
| ACG(T)                                                                                 | 6 (0.07)          | 4 (0.05)                                                               | AGG(*) | 1 (0.40)          | 2 (0.80)           |
| GCU(A)                                                                                 | 36 (0.45)         | 43 (0.53)                                                              | GGU(G) | 18 (0.32)         | 22 (0.39)          |
| GCC(A)                                                                                 | 176 (2.18)        | 170 (2.09)                                                             | GGC(G) | 95 (1.70)         | 83 (1.49)          |
| GCA(A)                                                                                 | 101 (1.25)        | 104 (1.28)                                                             | GGA(G) | 72 (1.29)         | 74 (1.33)          |
| GCG(A)                                                                                 | 10 (0.12)         | 8 (0.10)                                                               | GGG(G) | 39 (0.70)         | 44 (0.79)          |
| Relative synonymous codon usage is given in parentheses following the codon frequency. |                   |                                                                        |        |                   |                    |
| No. of codons                                                                          |                   | <i>Tarsiger indicus</i> : 3797; <i>Tarsiger cyanurus</i> : 3797        |        |                   |                    |

Table S3. The nucleotide composition and skew in the mitogenomes of 25 species of Muscicapidae.

| Species                                       | whole mitogenome |       |       |       |       |       |         |       |         | two rRNAs |       |       |       |      |       |         |       |         |
|-----------------------------------------------|------------------|-------|-------|-------|-------|-------|---------|-------|---------|-----------|-------|-------|-------|------|-------|---------|-------|---------|
|                                               | T(U)             | C     | A     | G     | Size  | %GC   | GC-skew | %AT   | AT-skew | T(U)      | C     | A     | G     | Size | %GC   | GC-skew | %AT   | AT-skew |
| <i>Calliope calliope</i> HQ690246             | 23.03            | 32.87 | 29.24 | 14.87 | 16841 | 47.73 | -0.38   | 52.27 | 0.12    | 20.68     | 26.34 | 32.77 | 20.22 | 2582 | 46.55 | -0.13   | 53.45 | 0.23    |
| <i>Copsychus saularis</i> KU058637            | 23.31            | 32.52 | 29.42 | 14.74 | 16827 | 47.26 | -0.38   | 52.74 | 0.12    | 20.55     | 26.33 | 32.76 | 20.36 | 2579 | 46.68 | -0.13   | 53.32 | 0.23    |
| <i>Copsychus sechellarum</i> MN356447         | 23.29            | 32.60 | 29.30 | 14.81 | 16836 | 47.41 | -0.38   | 52.59 | 0.11    | 20.70     | 26.38 | 32.53 | 20.39 | 2585 | 46.77 | -0.13   | 53.23 | 0.22    |
| <i>Cossypha semirufa</i> MT017889             | 24.25            | 30.98 | 29.77 | 15.00 | 16562 | 45.98 | -0.35   | 54.02 | 0.10    | 21.36     | 25.24 | 32.49 | 20.90 | 2579 | 46.14 | -0.09   | 53.86 | 0.21    |
| <i>Cyornis hainanus/rubeculoides</i> HQ896033 | 22.91            | 32.25 | 30.10 | 14.74 | 16802 | 46.99 | -0.37   | 53.01 | 0.14    | 20.77     | 26.09 | 32.80 | 20.34 | 2576 | 46.43 | -0.12   | 53.57 | 0.22    |
| <i>Cyornis magnirostris</i> ON746663          | 23.08            | 32.09 | 30.13 | 14.69 | 16816 | 46.79 | -0.37   | 53.21 | 0.13    | 20.58     | 26.22 | 33.18 | 20.03 | 2571 | 46.25 | -0.13   | 53.75 | 0.23    |
| <i>Enicurus schistaceus</i> OP998296          | 23.33            | 31.77 | 30.73 | 14.17 | 17112 | 45.94 | -0.38   | 54.06 | 0.14    | 20.93     | 25.46 | 33.39 | 20.23 | 2561 | 45.69 | -0.11   | 54.31 | 0.23    |
| <i>Ficedula albicollis</i> KF293721           | 22.59            | 33.10 | 29.06 | 15.26 | 16787 | 48.35 | -0.37   | 51.65 | 0.13    | 20.78     | 26.29 | 32.53 | 20.40 | 2579 | 46.68 | -0.13   | 53.32 | 0.22    |
| <i>Ficedula hyperythra</i> MW795347           | 22.55            | 33.19 | 29.27 | 14.98 | 16819 | 48.18 | -0.38   | 51.82 | 0.13    | 20.65     | 26.24 | 32.84 | 20.26 | 2576 | 46.51 | -0.13   | 53.49 | 0.23    |
| <i>Ficedula zanthopygia</i> JN018411          | 23.48            | 32.15 | 29.68 | 14.68 | 16794 | 46.84 | -0.37   | 53.16 | 0.12    | 20.84     | 25.96 | 32.89 | 20.30 | 2581 | 46.26 | -0.12   | 53.74 | 0.22    |
| <i>Larivora akahige akahige</i> LC541457      | 24.18            | 31.15 | 30.10 | 14.57 | 16824 | 45.72 | -0.36   | 54.28 | 0.11    | 21.45     | 25.44 | 32.75 | 20.36 | 2583 | 45.80 | -0.11   | 54.20 | 0.21    |
| <i>Larivora komadori namiyei</i> LC541462     | 24.33            | 30.62 | 30.57 | 14.48 | 16812 | 45.10 | -0.36   | 54.90 | 0.11    | 21.30     | 25.45 | 32.78 | 20.48 | 2578 | 45.93 | -0.11   | 54.07 | 0.21    |
| <i>Melaenornis chocolatinus</i> MT017899      | 23.06            | 32.32 | 29.98 | 14.64 | 16580 | 46.96 | -0.38   | 53.04 | 0.13    | 20.72     | 25.96 | 32.79 | 20.53 | 2577 | 46.49 | -0.12   | 53.51 | 0.23    |
| <i>Monticola gularis</i> KX506858             | 23.41            | 32.33 | 29.74 | 14.52 | 16801 | 46.85 | -0.38   | 53.15 | 0.12    | 21.00     | 25.83 | 32.95 | 20.22 | 2586 | 46.06 | -0.12   | 53.94 | 0.22    |
| <i>Muscicapa sibirica</i> MK390479            | 23.93            | 31.89 | 29.26 | 14.93 | 17897 | 46.82 | -0.36   | 53.18 | 0.10    | 20.92     | 25.89 | 32.85 | 20.33 | 2572 | 46.23 | -0.12   | 53.77 | 0.22    |
| <i>Muscicapa latirostris</i> MK770602         | 24.31            | 31.63 | 29.63 | 14.44 | 18025 | 46.06 | -0.37   | 53.94 | 0.10    | 20.98     | 25.81 | 32.85 | 20.36 | 2569 | 46.17 | -0.12   | 53.83 | 0.22    |
| <i>Muscicapa sibirica</i> MK770601            | 23.97            | 31.84 | 29.40 | 14.79 | 17879 | 46.63 | -0.37   | 53.37 | 0.10    | 20.77     | 26.06 | 32.87 | 20.30 | 2571 | 46.36 | -0.12   | 53.64 | 0.23    |
| <i>Myophonus caeruleus</i> MN564936           | 23.71            | 31.45 | 30.06 | 14.78 | 16815 | 46.23 | -0.36   | 53.77 | 0.12    | 21.06     | 25.09 | 33.18 | 20.67 | 2559 | 45.76 | -0.10   | 54.24 | 0.22    |
| <i>Niltava davidi</i> KY024217                | 23.70            | 31.44 | 30.47 | 14.39 | 16770 | 45.84 | -0.37   | 54.16 | 0.12    | 20.84     | 26.00 | 33.06 | 20.10 | 2577 | 46.10 | -0.13   | 53.90 | 0.23    |
| <i>Oenanthe isabellina</i> KU097327           | 22.68            | 33.00 | 29.98 | 14.34 | 16812 | 47.34 | -0.39   | 52.66 | 0.14    | 20.80     | 26.27 | 32.79 | 20.14 | 2577 | 46.41 | -0.13   | 53.59 | 0.22    |
| <i>Oenanthe oenanthe</i> MN356231             | 22.91            | 32.78 | 30.01 | 14.29 | 16825 | 47.08 | -0.39   | 52.92 | 0.13    | 20.49     | 26.58 | 32.63 | 20.29 | 2577 | 46.88 | -0.13   | 53.12 | 0.23    |
| <i>Phoenicurus aureus</i> KF997863            | 23.17            | 32.59 | 29.75 | 14.49 | 16772 | 47.08 | -0.38   | 52.92 | 0.12    | 20.34     | 26.54 | 33.05 | 20.07 | 2581 | 46.61 | -0.14   | 53.39 | 0.24    |
| <i>Phoenicurus frontalis</i> MT360379         | 23.30            | 32.36 | 30.02 | 14.32 | 16776 | 46.68 | -0.39   | 53.32 | 0.13    | 20.26     | 26.50 | 33.17 | 20.07 | 2581 | 46.57 | -0.14   | 53.43 | 0.24    |
| <i>Rhinomyias umbratilis</i> ON746672         | 23.27            | 31.86 | 29.77 | 15.10 | 16805 | 46.96 | -0.36   | 53.04 | 0.12    | 21.28     | 25.48 | 32.94 | 20.30 | 2571 | 45.78 | -0.11   | 54.22 | 0.22    |
| <i>Tarsiger cyanurus</i> KF997864             | 23.04            | 32.67 | 29.93 | 14.37 | 16803 | 47.03 | -0.39   | 52.97 | 0.13    | 20.70     | 26.23 | 32.84 | 20.23 | 2585 | 46.46 | -0.13   | 53.54 | 0.23    |
| <i>Tarsiger indicus</i> OR459825              | 22.75            | 32.88 | 29.63 | 14.73 | 16723 | 47.62 | -0.38   | 52.38 | 0.13    | 20.77     | 25.92 | 33.32 | 19.99 | 2581 | 45.91 | -0.13   | 54.09 | 0.23    |
| Avg.                                          | 23.37            | 32.16 | 29.80 | 14.66 | 16928 |       |         |       |         | 20.83     | 25.98 | 32.89 | 20.30 | 2577 |       |         |       |         |

| Species                                       | 13 PCGs |       |       |       |       |       |         |       |         | rrnL  |       |       |       |      |       |         |       |         |
|-----------------------------------------------|---------|-------|-------|-------|-------|-------|---------|-------|---------|-------|-------|-------|-------|------|-------|---------|-------|---------|
|                                               | T(U)    | C     | A     | G     | Size  | %GC   | GC-skew | %AT   | AT-skew | T(U)  | C     | A     | G     | Size | %GC   | GC-skew | %AT   | AT-skew |
| <i>Calliope calliope</i> HQ690246             | 23.94   | 33.95 | 27.28 | 14.83 | 11385 | 48.77 | -0.39   | 51.23 | 0.07    | 20.31 | 25.81 | 34.25 | 19.63 | 1600 | 45.44 | -0.14   | 54.56 | 0.26    |
| <i>Copsychus saularis</i> KU058637            | 24.47   | 33.73 | 27.10 | 14.70 | 11388 | 48.43 | -0.39   | 51.57 | 0.05    | 20.65 | 25.34 | 34.04 | 19.96 | 1598 | 45.31 | -0.12   | 54.69 | 0.24    |
| <i>Copsychus sechellarum</i> MN356447         | 24.38   | 33.82 | 27.05 | 14.75 | 11388 | 48.57 | -0.39   | 51.43 | 0.05    | 20.65 | 25.47 | 33.85 | 20.03 | 1598 | 45.49 | -0.12   | 54.51 | 0.24    |
| <i>Cossypha semirufa</i> MT017889             | 25.33   | 32.01 | 28.07 | 14.59 | 11391 | 46.60 | -0.37   | 53.40 | 0.05    | 21.57 | 23.70 | 34.36 | 20.38 | 1595 | 44.08 | -0.08   | 55.92 | 0.23    |
| <i>Cyornis hainanus/rubeculoides</i> HQ896033 | 24.00   | 33.28 | 28.07 | 14.64 | 11391 | 47.92 | -0.39   | 52.08 | 0.08    | 20.53 | 25.36 | 34.15 | 19.96 | 1593 | 45.32 | -0.12   | 54.68 | 0.25    |
| <i>Cyornis magnirostris</i> ON746663          | 24.21   | 33.13 | 28.10 | 14.56 | 11400 | 47.69 | -0.39   | 52.31 | 0.07    | 20.32 | 25.55 | 34.57 | 19.56 | 1585 | 45.11 | -0.13   | 54.89 | 0.26    |
| <i>Enicurus schistaceus</i> OP998296          | 24.14   | 33.07 | 29.12 | 13.67 | 11394 | 46.74 | -0.41   | 53.26 | 0.09    | 21.08 | 24.30 | 34.87 | 19.75 | 1580 | 44.05 | -0.10   | 55.95 | 0.25    |
| <i>Ficedula albicollis</i> KF293721           | 23.32   | 34.65 | 26.84 | 15.19 | 11412 | 49.84 | -0.39   | 50.16 | 0.07    | 20.93 | 25.19 | 33.90 | 19.99 | 1596 | 45.18 | -0.12   | 54.82 | 0.24    |
| <i>Ficedula hyperythra</i> MW795347           | 23.48   | 34.46 | 27.04 | 15.02 | 11403 | 49.49 | -0.39   | 50.51 | 0.07    | 20.44 | 25.58 | 34.29 | 19.69 | 1595 | 45.27 | -0.13   | 54.73 | 0.25    |
| <i>Ficedula zanthopygia</i> JN018411          | 24.68   | 33.13 | 27.73 | 14.46 | 11391 | 47.59 | -0.39   | 52.41 | 0.06    | 20.66 | 25.11 | 34.56 | 19.66 | 1597 | 44.77 | -0.12   | 55.23 | 0.25    |
| <i>Larivora akahige akahige</i> LC541457      | 25.29   | 32.02 | 28.39 | 14.31 | 11385 | 46.32 | -0.38   | 53.68 | 0.06    | 21.21 | 24.91 | 34.11 | 19.77 | 1598 | 44.68 | -0.11   | 55.32 | 0.23    |
| <i>Larivora komadori namiyei</i> LC541462     | 25.52   | 31.37 | 28.93 | 14.18 | 11385 | 45.55 | -0.38   | 54.45 | 0.06    | 21.15 | 24.84 | 34.04 | 19.96 | 1598 | 44.81 | -0.11   | 55.19 | 0.23    |
| <i>Melaenornis chocolatinus</i> MT017899      | 24.21   | 33.32 | 28.04 | 14.42 | 11391 | 47.75 | -0.40   | 52.25 | 0.07    | 20.79 | 25.11 | 34.00 | 20.10 | 1597 | 45.21 | -0.11   | 54.79 | 0.24    |
| <i>Monticola gularis</i> KX506858             | 24.43   | 33.66 | 27.79 | 14.13 | 11391 | 47.78 | -0.41   | 52.22 | 0.06    | 20.91 | 24.97 | 34.33 | 19.79 | 1602 | 44.76 | -0.12   | 55.24 | 0.24    |
| <i>Muscicapa sibirica</i> MK390479            | 24.56   | 33.21 | 27.49 | 14.74 | 11391 | 47.95 | -0.39   | 52.05 | 0.06    | 20.39 | 25.61 | 34.17 | 19.82 | 1589 | 45.44 | -0.13   | 54.56 | 0.25    |
| <i>Muscicapa latirostris</i> MK770602         | 25.16   | 32.81 | 27.81 | 14.22 | 11391 | 47.03 | -0.40   | 52.97 | 0.05    | 20.70 | 25.24 | 34.17 | 19.89 | 1589 | 45.12 | -0.12   | 54.88 | 0.25    |
| <i>Muscicapa sibirica</i> MK770601            | 24.65   | 33.09 | 27.80 | 14.46 | 11391 | 47.55 | -0.39   | 52.45 | 0.06    | 20.20 | 25.74 | 34.24 | 19.82 | 1589 | 45.56 | -0.13   | 54.44 | 0.26    |
| <i>Myophonus caeruleus</i> MN564936           | 24.63   | 32.67 | 28.19 | 14.50 | 11391 | 47.18 | -0.39   | 52.82 | 0.07    | 21.28 | 23.94 | 34.39 | 20.39 | 1579 | 44.33 | -0.08   | 55.67 | 0.24    |
| <i>Niltava davidi</i> KY024217                | 24.66   | 32.38 | 28.70 | 14.27 | 11391 | 46.64 | -0.39   | 53.36 | 0.08    | 20.86 | 25.00 | 34.34 | 19.80 | 1596 | 44.80 | -0.12   | 55.20 | 0.24    |
| <i>Oenanthe isabellina</i> KU097327           | 23.48   | 34.43 | 28.07 | 14.01 | 11391 | 48.44 | -0.42   | 51.56 | 0.09    | 20.79 | 25.30 | 34.38 | 19.54 | 1597 | 44.83 | -0.13   | 55.17 | 0.25    |
| <i>Oenanthe oenanthe</i> MN356231             | 23.94   | 33.88 | 28.06 | 14.12 | 11399 | 48.00 | -0.41   | 52.00 | 0.08    | 20.25 | 25.77 | 34.11 | 19.87 | 1595 | 45.64 | -0.13   | 54.36 | 0.25    |
| <i>Phoenicurus aureus</i> KF997863            | 24.18   | 33.75 | 27.80 | 14.27 | 11391 | 48.02 | -0.41   | 51.98 | 0.07    | 20.08 | 25.83 | 34.46 | 19.64 | 1599 | 45.47 | -0.14   | 54.53 | 0.26    |
| <i>Phoenicurus frontalis</i> MT360379         | 24.42   | 33.45 | 28.02 | 14.11 | 11394 | 47.56 | -0.41   | 52.44 | 0.07    | 19.89 | 26.02 | 34.65 | 19.45 | 1599 | 45.47 | -0.14   | 54.53 | 0.27    |
| <i>Rhinomyias umbratilis</i> ON746672         | 24.28   | 32.88 | 27.74 | 15.11 | 11400 | 47.98 | -0.37   | 52.02 | 0.07    | 21.01 | 24.79 | 34.45 | 19.75 | 1585 | 44.54 | -0.11   | 55.46 | 0.24    |
| <i>Tarsiger cyanurus</i> KF997864             | 23.96   | 33.77 | 28.14 | 14.13 | 11391 | 47.91 | -0.41   | 52.09 | 0.08    | 20.60 | 25.41 | 34.21 | 19.79 | 1602 | 45.19 | -0.12   | 54.81 | 0.25    |
| <i>Tarsiger indicus</i> OR459825              | 23.52   | 34.31 | 27.67 | 14.50 | 11391 | 48.81 | -0.41   | 51.19 | 0.08    | 20.64 | 25.14 | 34.77 | 19.45 | 1599 | 44.59 | -0.13   | 55.41 | 0.26    |
| Avg.                                          | 24.34   | 33.32 | 27.89 | 14.46 | 11393 |       |         |       |         | 20.69 | 25.19 | 34.29 | 19.82 | 1594 |       |         |       |         |

| Species                                       | rrnS  |       |       |       |      |       |         |       |         | ATP6  |       |       |       |      |       |         |       |         |
|-----------------------------------------------|-------|-------|-------|-------|------|-------|---------|-------|---------|-------|-------|-------|-------|------|-------|---------|-------|---------|
|                                               | T(U)  | C     | A     | G     | Size | %GC   | GC-skew | %AT   | AT-skew | T(U)  | C     | A     | G     | Size | %GC   | GC-skew | %AT   | AT-skew |
| <i>Calliope calliope</i> HQ690246             | 21.28 | 27.19 | 30.35 | 21.18 | 982  | 48.37 | -0.12   | 51.63 | 0.18    | 22.81 | 37.72 | 28.95 | 10.53 | 684  | 48.25 | -0.56   | 51.75 | 0.12    |
| <i>Copsychus saularis</i> KU058637            | 20.39 | 27.93 | 30.68 | 21.00 | 981  | 48.93 | -0.14   | 51.07 | 0.20    | 23.83 | 37.72 | 27.19 | 11.26 | 684  | 48.98 | -0.54   | 51.02 | 0.07    |
| <i>Copsychus sechellarum</i> MN356447         | 20.77 | 27.86 | 30.40 | 20.97 | 987  | 48.83 | -0.14   | 51.17 | 0.19    | 23.83 | 37.28 | 27.34 | 11.55 | 684  | 48.83 | -0.53   | 51.17 | 0.07    |
| <i>Cossypha semirufa</i> MT017889             | 21.04 | 27.74 | 29.47 | 21.75 | 984  | 49.49 | -0.12   | 50.51 | 0.17    | 25.58 | 34.80 | 28.22 | 11.40 | 684  | 46.20 | -0.51   | 53.80 | 0.05    |
| <i>Cyornis hainanus/rubeculoides</i> HQ896033 | 21.16 | 27.26 | 30.62 | 20.96 | 983  | 48.22 | -0.13   | 51.78 | 0.18    | 24.42 | 35.23 | 29.68 | 10.67 | 684  | 45.91 | -0.54   | 54.09 | 0.10    |
| <i>Cyornis magnirostris</i> ON746663          | 20.99 | 27.28 | 30.93 | 20.79 | 986  | 48.07 | -0.14   | 51.93 | 0.19    | 24.85 | 34.50 | 29.09 | 11.55 | 684  | 46.05 | -0.50   | 53.95 | 0.08    |
| <i>Enicurus schistaceus</i> OP998296          | 20.69 | 27.32 | 30.99 | 21.00 | 981  | 48.32 | -0.13   | 51.68 | 0.20    | 22.37 | 37.13 | 30.56 | 9.94  | 684  | 47.08 | -0.58   | 52.92 | 0.15    |
| <i>Ficedula albicollis</i> KF293721           | 20.55 | 28.08 | 30.32 | 21.06 | 983  | 49.14 | -0.14   | 50.86 | 0.19    | 21.79 | 39.11 | 27.42 | 11.69 | 693  | 50.79 | -0.54   | 49.21 | 0.11    |
| <i>Ficedula hyperythra</i> MW795347           | 21.00 | 27.32 | 30.48 | 21.20 | 981  | 48.52 | -0.13   | 51.48 | 0.18    | 23.54 | 37.13 | 28.36 | 10.96 | 684  | 48.10 | -0.54   | 51.90 | 0.09    |
| <i>Ficedula zanthopygia</i> JN018411          | 21.14 | 27.34 | 30.18 | 21.34 | 984  | 48.68 | -0.12   | 51.32 | 0.18    | 22.95 | 36.11 | 30.12 | 10.82 | 684  | 46.93 | -0.54   | 53.07 | 0.13    |
| <i>Larivora akahige akahige</i> LC541457      | 21.83 | 26.29 | 30.56 | 21.32 | 985  | 47.61 | -0.10   | 52.39 | 0.17    | 23.68 | 36.70 | 29.09 | 10.53 | 684  | 47.22 | -0.55   | 52.78 | 0.10    |
| <i>Larivora komadori namiyei</i> LC541462     | 21.53 | 26.43 | 30.71 | 21.33 | 980  | 47.76 | -0.11   | 52.24 | 0.18    | 25.58 | 34.80 | 29.24 | 10.38 | 684  | 45.18 | -0.54   | 54.82 | 0.07    |
| <i>Melaenornis chocolatinus</i> MT017899      | 20.61 | 27.35 | 30.82 | 21.22 | 980  | 48.57 | -0.13   | 51.43 | 0.20    | 23.68 | 37.13 | 28.51 | 10.67 | 684  | 47.81 | -0.55   | 52.19 | 0.09    |
| <i>Monticola gularis</i> KX506858             | 21.14 | 27.24 | 30.69 | 20.93 | 984  | 48.17 | -0.13   | 51.83 | 0.18    | 22.81 | 38.45 | 28.22 | 10.53 | 684  | 48.98 | -0.57   | 51.02 | 0.11    |
| <i>Muscicapa sibirica</i> MK390479            | 21.77 | 26.35 | 30.72 | 21.16 | 983  | 47.51 | -0.11   | 52.49 | 0.17    | 24.71 | 36.26 | 27.63 | 11.40 | 684  | 47.66 | -0.52   | 52.34 | 0.06    |
| <i>Muscicapa latirostris</i> MK770602         | 21.43 | 26.73 | 30.71 | 21.12 | 980  | 47.86 | -0.12   | 52.14 | 0.18    | 24.71 | 35.82 | 29.09 | 10.38 | 684  | 46.20 | -0.55   | 53.80 | 0.08    |
| <i>Muscicapa sibirica</i> MK770601            | 21.69 | 26.58 | 30.65 | 21.08 | 982  | 47.66 | -0.12   | 52.34 | 0.17    | 24.85 | 35.67 | 28.51 | 10.96 | 684  | 46.64 | -0.53   | 53.36 | 0.07    |
| <i>Myophonus caeruleus</i> MN564936           | 20.71 | 26.94 | 31.22 | 21.12 | 980  | 48.06 | -0.12   | 51.94 | 0.20    | 24.42 | 35.82 | 29.24 | 10.53 | 684  | 46.35 | -0.55   | 53.65 | 0.09    |
| <i>Niltava davidi</i> KY024217                | 20.80 | 27.62 | 30.99 | 20.59 | 981  | 48.22 | -0.15   | 51.78 | 0.20    | 24.56 | 35.67 | 29.39 | 10.38 | 684  | 46.05 | -0.55   | 53.95 | 0.09    |
| <i>Oenanthe isabellina</i> KU097327           | 20.82 | 27.86 | 30.20 | 21.12 | 980  | 48.98 | -0.14   | 51.02 | 0.18    | 22.66 | 38.16 | 29.24 | 9.94  | 684  | 48.10 | -0.59   | 51.90 | 0.13    |
| <i>Oenanthe oenanthe</i> MN356231             | 20.88 | 27.90 | 30.24 | 20.98 | 982  | 48.88 | -0.14   | 51.12 | 0.18    | 23.25 | 37.72 | 28.65 | 10.38 | 684  | 48.10 | -0.57   | 51.90 | 0.10    |
| <i>Phoenicurus aureus</i> KF997863            | 20.77 | 27.70 | 30.75 | 20.77 | 982  | 48.47 | -0.14   | 51.53 | 0.19    | 22.95 | 38.30 | 27.05 | 11.70 | 684  | 50.00 | -0.53   | 50.00 | 0.08    |
| <i>Phoenicurus frontalis</i> MT360379         | 20.88 | 27.29 | 30.75 | 21.08 | 982  | 48.37 | -0.13   | 51.63 | 0.19    | 23.39 | 38.60 | 27.05 | 10.96 | 684  | 49.56 | -0.56   | 50.44 | 0.07    |
| <i>Rhinomyias umbratilis</i> ON746672         | 21.70 | 26.57 | 30.53 | 21.20 | 986  | 47.77 | -0.11   | 52.23 | 0.17    | 22.51 | 36.84 | 28.22 | 12.43 | 684  | 49.27 | -0.50   | 50.73 | 0.11    |
| <i>Tarsiger cyanurus</i> KF997864             | 20.85 | 27.57 | 30.62 | 20.96 | 983  | 48.52 | -0.14   | 51.48 | 0.19    | 23.10 | 38.01 | 27.63 | 11.26 | 684  | 49.27 | -0.54   | 50.73 | 0.09    |
| <i>Tarsiger indicus</i> OR459825              | 20.98 | 27.19 | 30.96 | 20.88 | 982  | 48.07 | -0.13   | 51.93 | 0.19    | 22.66 | 38.16 | 28.22 | 10.96 | 684  | 49.12 | -0.55   | 50.88 | 0.11    |
| Avg.                                          | 21.05 | 27.27 | 30.60 | 21.08 | 982  |       |         |       |         | 23.67 | 36.88 | 28.53 | 10.91 | 684  |       |         |       |         |

| Species                                       | ATP8  |       |       |      |      |       |         |       |         | COX1  |       |       |       |      |       |         |       |         |
|-----------------------------------------------|-------|-------|-------|------|------|-------|---------|-------|---------|-------|-------|-------|-------|------|-------|---------|-------|---------|
|                                               | T(U)  | C     | A     | G    | Size | %GC   | GC-skew | %AT   | AT-skew | T(U)  | C     | A     | G     | Size | %GC   | GC-skew | %AT   | AT-skew |
| <i>Calliope calliope</i> HQ690246             | 22.62 | 38.10 | 32.74 | 6.55 | 168  | 44.64 | -0.71   | 55.36 | 0.18    | 23.60 | 32.62 | 26.11 | 17.67 | 1551 | 50.29 | -0.30   | 49.71 | 0.05    |
| <i>Copsychus saularis</i> KU058637            | 23.81 | 37.50 | 30.95 | 7.74 | 168  | 45.24 | -0.66   | 54.76 | 0.13    | 24.50 | 31.40 | 27.08 | 17.02 | 1551 | 48.42 | -0.30   | 51.58 | 0.05    |
| <i>Copsychus sechellarum</i> MN356447         | 24.40 | 36.90 | 30.95 | 7.74 | 168  | 44.64 | -0.65   | 55.36 | 0.12    | 24.24 | 31.72 | 26.89 | 17.15 | 1551 | 48.87 | -0.30   | 51.13 | 0.05    |
| <i>Cossypha semirufa</i> MT017889             | 25.60 | 36.31 | 29.17 | 8.93 | 168  | 45.24 | -0.61   | 54.76 | 0.07    | 24.63 | 31.01 | 27.47 | 16.89 | 1551 | 47.90 | -0.29   | 52.10 | 0.05    |
| <i>Cyornis hainanus/rubeculoides</i> HQ896033 | 23.81 | 38.10 | 32.74 | 5.36 | 168  | 43.45 | -0.75   | 56.55 | 0.16    | 23.47 | 32.24 | 27.47 | 16.83 | 1551 | 49.07 | -0.31   | 50.93 | 0.08    |
| <i>Cyornis magnirostris</i> ON746663          | 23.21 | 38.69 | 32.74 | 5.36 | 168  | 44.05 | -0.76   | 55.95 | 0.17    | 23.85 | 32.05 | 26.86 | 17.24 | 1560 | 49.29 | -0.30   | 50.71 | 0.06    |
| <i>Enicurus schistaceus</i> OP998296          | 23.81 | 38.10 | 32.74 | 5.36 | 168  | 43.45 | -0.75   | 56.55 | 0.16    | 24.05 | 31.21 | 28.56 | 16.18 | 1551 | 47.39 | -0.32   | 52.61 | 0.09    |
| <i>Ficedula albicollis</i> KF293721           | 25.60 | 36.90 | 32.14 | 5.36 | 168  | 42.26 | -0.75   | 57.74 | 0.11    | 23.14 | 32.88 | 26.79 | 17.18 | 1560 | 50.06 | -0.31   | 49.94 | 0.07    |
| <i>Ficedula hyperythra</i> MW795347           | 23.21 | 39.29 | 32.14 | 5.36 | 168  | 44.64 | -0.76   | 55.36 | 0.16    | 23.59 | 32.24 | 26.47 | 17.69 | 1560 | 49.94 | -0.29   | 50.06 | 0.06    |
| <i>Ficedula zanthopygia</i> JN018411          | 25.00 | 36.90 | 32.14 | 5.95 | 168  | 42.86 | -0.72   | 57.14 | 0.13    | 25.34 | 30.56 | 26.95 | 17.15 | 1551 | 47.71 | -0.28   | 52.29 | 0.03    |
| <i>Larivora akahige akahige</i> LC541457      | 24.40 | 35.12 | 35.12 | 5.36 | 168  | 40.48 | -0.74   | 59.52 | 0.18    | 25.02 | 30.17 | 28.05 | 16.76 | 1551 | 46.94 | -0.29   | 53.06 | 0.06    |
| <i>Larivora komadori namiyei</i> LC541462     | 25.00 | 34.52 | 35.12 | 5.36 | 168  | 39.88 | -0.73   | 60.12 | 0.17    | 25.60 | 29.40 | 28.30 | 16.70 | 1551 | 46.10 | -0.28   | 53.90 | 0.05    |
| <i>Melaenornis chocolatinus</i> MT017899      | 20.83 | 39.29 | 33.93 | 5.95 | 168  | 45.24 | -0.74   | 54.76 | 0.24    | 24.05 | 31.59 | 27.27 | 17.09 | 1551 | 48.68 | -0.30   | 51.32 | 0.06    |
| <i>Monticola gularis</i> KX506858             | 24.40 | 39.29 | 31.55 | 4.76 | 168  | 44.05 | -0.78   | 55.95 | 0.13    | 24.05 | 31.79 | 27.14 | 17.02 | 1551 | 48.81 | -0.30   | 51.19 | 0.06    |
| <i>Muscicapa sibirica</i> MK390479            | 20.83 | 39.29 | 32.74 | 7.14 | 168  | 46.43 | -0.69   | 53.57 | 0.22    | 24.50 | 31.08 | 26.95 | 17.47 | 1551 | 48.55 | -0.28   | 51.45 | 0.05    |
| <i>Muscicapa latirostris</i> MK770602         | 23.81 | 36.90 | 33.93 | 5.36 | 168  | 42.26 | -0.75   | 57.74 | 0.18    | 24.76 | 31.01 | 27.08 | 17.15 | 1551 | 48.16 | -0.29   | 51.84 | 0.04    |
| <i>Muscicapa sibirica</i> MK770601            | 20.83 | 39.29 | 32.74 | 7.14 | 168  | 46.43 | -0.69   | 53.57 | 0.22    | 24.76 | 30.82 | 27.21 | 17.21 | 1551 | 48.03 | -0.28   | 51.97 | 0.05    |
| <i>Myophonus caeruleus</i> MN564936           | 25.00 | 35.71 | 31.55 | 7.74 | 168  | 43.45 | -0.64   | 56.55 | 0.12    | 24.56 | 30.50 | 27.79 | 17.15 | 1551 | 47.65 | -0.28   | 52.35 | 0.06    |
| <i>Niltava davidi</i> KY024217                | 22.02 | 36.90 | 35.71 | 5.36 | 168  | 42.26 | -0.75   | 57.74 | 0.24    | 24.37 | 30.95 | 27.79 | 16.89 | 1551 | 47.84 | -0.29   | 52.16 | 0.07    |
| <i>Oenanthe isabellina</i> KU097327           | 23.81 | 37.50 | 34.52 | 4.17 | 168  | 41.67 | -0.80   | 58.33 | 0.18    | 23.73 | 32.62 | 27.40 | 16.25 | 1551 | 48.87 | -0.34   | 51.13 | 0.07    |
| <i>Oenanthe oenanthe</i> MN356231             | 26.19 | 35.12 | 32.74 | 5.95 | 168  | 41.07 | -0.71   | 58.93 | 0.11    | 23.91 | 32.63 | 27.24 | 16.22 | 1560 | 48.85 | -0.34   | 51.15 | 0.07    |
| <i>Phoenicurus aureus</i> KF997863            | 24.40 | 35.12 | 34.52 | 5.95 | 168  | 41.07 | -0.71   | 58.93 | 0.17    | 25.08 | 31.01 | 27.01 | 16.89 | 1551 | 47.90 | -0.29   | 52.10 | 0.04    |
| <i>Phoenicurus frontalis</i> MT360379         | 23.81 | 36.90 | 34.52 | 4.76 | 168  | 41.67 | -0.77   | 58.33 | 0.18    | 23.73 | 32.30 | 27.40 | 16.57 | 1551 | 48.87 | -0.32   | 51.13 | 0.07    |
| <i>Rhinomyias umbratilis</i> ON746672         | 23.81 | 38.10 | 33.33 | 4.76 | 168  | 42.86 | -0.78   | 57.14 | 0.17    | 25.00 | 30.71 | 26.99 | 17.31 | 1560 | 48.01 | -0.28   | 51.99 | 0.04    |
| <i>Tarsiger cyanurus</i> KF997864             | 22.62 | 38.69 | 32.74 | 5.95 | 168  | 44.64 | -0.73   | 55.36 | 0.18    | 23.66 | 32.56 | 27.21 | 16.57 | 1551 | 49.13 | -0.33   | 50.87 | 0.07    |
| <i>Tarsiger indicus</i> OR459825              | 23.21 | 39.29 | 30.95 | 6.55 | 168  | 45.83 | -0.71   | 54.17 | 0.14    | 23.53 | 32.24 | 26.95 | 17.28 | 1551 | 49.52 | -0.30   | 50.48 | 0.07    |
| Avg.                                          | 23.70 | 37.45 | 32.85 | 6.00 | 168  |       |         |       |         | 24.26 | 31.51 | 27.25 | 16.98 | 1553 |       |         |       |         |

| Species                                       | COX2  |       |       |       |      |       |         |       |         | COX3  |       |       |       |      |       |         |       |         |
|-----------------------------------------------|-------|-------|-------|-------|------|-------|---------|-------|---------|-------|-------|-------|-------|------|-------|---------|-------|---------|
|                                               | T(U)  | C     | A     | G     | Size | %GC   | GC-skew | %AT   | AT-skew | T(U)  | C     | A     | G     | Size | %GC   | GC-skew | %AT   | AT-skew |
| <i>Calliope calliope</i> HQ690246             | 21.78 | 34.80 | 27.92 | 15.50 | 684  | 50.29 | -0.38   | 49.71 | 0.12    | 24.23 | 33.67 | 26.28 | 15.82 | 784  | 49.49 | -0.36   | 50.51 | 0.04    |
| <i>Copsychus saularis</i> KU058637            | 23.10 | 33.48 | 27.49 | 15.94 | 684  | 49.42 | -0.36   | 50.58 | 0.09    | 25.38 | 32.91 | 25.77 | 15.94 | 784  | 48.85 | -0.35   | 51.15 | 0.01    |
| <i>Copsychus sechellarum</i> MN356447         | 22.95 | 33.63 | 28.07 | 15.35 | 684  | 48.98 | -0.37   | 51.02 | 0.10    | 25.00 | 33.42 | 25.77 | 15.82 | 784  | 49.23 | -0.36   | 50.77 | 0.02    |
| <i>Cossypha semirufa</i> MT017889             | 25.73 | 29.68 | 29.24 | 15.35 | 684  | 45.03 | -0.32   | 54.97 | 0.06    | 25.38 | 32.14 | 26.53 | 15.94 | 784  | 48.09 | -0.34   | 51.91 | 0.02    |
| <i>Cyornis hainanus/rubeculoides</i> HQ896033 | 23.54 | 31.87 | 28.51 | 16.08 | 684  | 47.95 | -0.33   | 52.05 | 0.10    | 23.98 | 33.93 | 26.02 | 16.07 | 784  | 50.00 | -0.36   | 50.00 | 0.04    |
| <i>Cyornis magnirostris</i> ON746663          | 22.08 | 33.19 | 28.80 | 15.94 | 684  | 49.12 | -0.35   | 50.88 | 0.13    | 23.72 | 34.18 | 26.02 | 16.07 | 784  | 50.26 | -0.36   | 49.74 | 0.05    |
| <i>Enicurus schistaceus</i> OP998296          | 22.81 | 31.58 | 30.41 | 15.20 | 684  | 46.78 | -0.35   | 53.22 | 0.14    | 23.72 | 33.93 | 27.68 | 14.67 | 784  | 48.60 | -0.40   | 51.40 | 0.08    |
| <i>Ficedula albicollis</i> KF293721           | 22.95 | 33.63 | 27.19 | 16.23 | 684  | 49.85 | -0.35   | 50.15 | 0.08    | 22.45 | 36.35 | 25.64 | 15.56 | 784  | 51.91 | -0.40   | 48.09 | 0.07    |
| <i>Ficedula hyperythra</i> MW795347           | 21.78 | 34.06 | 27.92 | 16.23 | 684  | 50.29 | -0.35   | 49.71 | 0.12    | 22.70 | 35.46 | 26.28 | 15.56 | 784  | 51.02 | -0.39   | 48.98 | 0.07    |
| <i>Ficedula zanthopygia</i> JN018411          | 23.39 | 32.75 | 28.22 | 15.64 | 684  | 48.39 | -0.35   | 51.61 | 0.09    | 25.89 | 32.65 | 26.15 | 15.31 | 784  | 47.96 | -0.36   | 52.04 | 0.00    |
| <i>Larivora akahige akahige</i> LC541457      | 23.39 | 32.31 | 29.09 | 15.20 | 684  | 47.51 | -0.36   | 52.49 | 0.11    | 25.26 | 31.76 | 27.93 | 15.05 | 784  | 46.81 | -0.36   | 53.19 | 0.05    |
| <i>Larivora komadori namiyei</i> LC541462     | 23.68 | 31.14 | 29.53 | 15.64 | 684  | 46.78 | -0.33   | 53.22 | 0.11    | 24.49 | 32.27 | 27.93 | 15.31 | 784  | 47.58 | -0.36   | 52.42 | 0.07    |
| <i>Melaenornis chocolatinus</i> MT017899      | 24.67 | 32.41 | 27.59 | 15.33 | 685  | 47.74 | -0.36   | 52.26 | 0.06    | 23.72 | 33.42 | 26.91 | 15.94 | 784  | 49.36 | -0.35   | 50.64 | 0.06    |
| <i>Monticola gularis</i> KX506858             | 23.10 | 32.89 | 28.22 | 15.79 | 684  | 48.68 | -0.35   | 51.32 | 0.10    | 23.98 | 33.93 | 26.91 | 15.18 | 784  | 49.11 | -0.38   | 50.89 | 0.06    |
| <i>Muscicapa sibirica</i> MK390479            | 25.15 | 31.73 | 27.19 | 15.94 | 684  | 47.66 | -0.33   | 52.34 | 0.04    | 23.72 | 33.93 | 26.40 | 15.94 | 784  | 49.87 | -0.36   | 50.13 | 0.05    |
| <i>Muscicapa latirostris</i> MK770602         | 24.27 | 32.75 | 28.22 | 14.77 | 684  | 47.51 | -0.38   | 52.49 | 0.08    | 25.77 | 31.63 | 26.53 | 16.07 | 784  | 47.70 | -0.33   | 52.30 | 0.01    |
| <i>Muscicapa sibirica</i> MK770601            | 25.29 | 31.43 | 27.78 | 15.50 | 684  | 46.93 | -0.34   | 53.07 | 0.05    | 23.98 | 33.67 | 26.79 | 15.56 | 784  | 49.23 | -0.37   | 50.77 | 0.06    |
| <i>Myophonus caeruleus</i> MN564936           | 22.95 | 32.31 | 28.95 | 15.79 | 684  | 48.10 | -0.34   | 51.90 | 0.12    | 25.26 | 32.14 | 27.30 | 15.31 | 784  | 47.45 | -0.35   | 52.55 | 0.04    |
| <i>Niltava davidi</i> KY024217                | 23.25 | 32.75 | 28.22 | 15.79 | 684  | 48.54 | -0.35   | 51.46 | 0.10    | 24.11 | 33.16 | 27.04 | 15.69 | 784  | 48.85 | -0.36   | 51.15 | 0.06    |
| <i>Oenanthe isabellina</i> KU097327           | 22.51 | 33.19 | 28.51 | 15.79 | 684  | 48.98 | -0.36   | 51.02 | 0.12    | 22.45 | 35.84 | 26.28 | 15.43 | 784  | 51.28 | -0.40   | 48.72 | 0.08    |
| <i>Oenanthe oenanthe</i> MN356231             | 23.10 | 32.60 | 27.78 | 16.52 | 684  | 49.12 | -0.33   | 50.88 | 0.09    | 22.96 | 35.20 | 26.40 | 15.43 | 784  | 50.64 | -0.39   | 49.36 | 0.07    |
| <i>Phoenicurus aureus</i> KF997863            | 22.95 | 32.89 | 28.65 | 15.50 | 684  | 48.39 | -0.36   | 51.61 | 0.11    | 24.62 | 34.31 | 24.87 | 16.20 | 784  | 50.51 | -0.36   | 49.49 | 0.01    |
| <i>Phoenicurus frontalis</i> MT360379         | 22.95 | 32.46 | 29.09 | 15.50 | 684  | 47.95 | -0.35   | 52.05 | 0.12    | 24.23 | 33.93 | 26.28 | 15.56 | 784  | 49.49 | -0.37   | 50.51 | 0.04    |
| <i>Rhinomyias umbratilis</i> ON746672         | 22.81 | 32.31 | 28.65 | 16.23 | 684  | 48.54 | -0.33   | 51.46 | 0.11    | 24.87 | 32.27 | 26.53 | 16.33 | 784  | 48.60 | -0.33   | 51.40 | 0.03    |
| <i>Tarsiger cyanurus</i> KF997864             | 22.66 | 33.04 | 28.80 | 15.50 | 684  | 48.54 | -0.36   | 51.46 | 0.12    | 25.13 | 32.91 | 26.79 | 15.18 | 784  | 48.09 | -0.37   | 51.91 | 0.03    |
| <i>Tarsiger indicus</i> OR459825              | 22.66 | 33.33 | 27.92 | 16.08 | 684  | 49.42 | -0.35   | 50.58 | 0.10    | 23.98 | 33.93 | 26.40 | 15.69 | 784  | 49.62 | -0.37   | 50.38 | 0.05    |
| Avg.                                          | 23.29 | 32.62 | 28.38 | 15.70 | 684  |       |         |       |         | 24.27 | 33.58 | 26.52 | 15.64 | 784  |       |         |       |         |

| Species                                       | Cytb  |       |       |       |      |       |         |       |         | ND1   |       |       |       |      |       |         |       |         |
|-----------------------------------------------|-------|-------|-------|-------|------|-------|---------|-------|---------|-------|-------|-------|-------|------|-------|---------|-------|---------|
|                                               | T(U)  | C     | A     | G     | Size | %GC   | GC-skew | %AT   | AT-skew | T(U)  | C     | A     | G     | Size | %GC   | GC-skew | %AT   | AT-skew |
| <i>Calliope calliope</i> HQ690246             | 24.52 | 34.24 | 27.76 | 13.49 | 1142 | 47.72 | -0.43   | 52.28 | 0.06    | 25.05 | 33.64 | 26.38 | 14.93 | 978  | 48.57 | -0.39   | 51.43 | 0.03    |
| <i>Copsychus saularis</i> KU058637            | 22.92 | 35.61 | 28.17 | 13.30 | 1143 | 48.91 | -0.46   | 51.09 | 0.10    | 26.28 | 33.23 | 24.95 | 15.54 | 978  | 48.77 | -0.36   | 51.23 | -0.03   |
| <i>Copsychus sechellarum</i> MN356447         | 22.75 | 35.87 | 28.08 | 13.30 | 1143 | 49.17 | -0.46   | 50.83 | 0.10    | 26.07 | 33.44 | 24.34 | 16.16 | 978  | 49.59 | -0.35   | 50.41 | -0.03   |
| <i>Cossypha semirufa</i> MT017889             | 23.71 | 34.65 | 28.43 | 13.21 | 1143 | 47.86 | -0.45   | 52.14 | 0.09    | 26.18 | 31.39 | 27.61 | 14.83 | 978  | 46.22 | -0.36   | 53.78 | 0.03    |
| <i>Cyornis hainanus/rubeculoides</i> HQ896033 | 23.18 | 34.38 | 29.05 | 13.39 | 1143 | 47.77 | -0.44   | 52.23 | 0.11    | 24.34 | 34.76 | 26.07 | 14.83 | 978  | 49.59 | -0.40   | 50.41 | 0.03    |
| <i>Cyornis magnirostris</i> ON746663          | 25.02 | 32.98 | 28.78 | 13.21 | 1143 | 46.19 | -0.43   | 53.81 | 0.07    | 24.85 | 33.74 | 26.58 | 14.83 | 978  | 48.57 | -0.39   | 51.43 | 0.03    |
| <i>Enicurus schistaceus</i> OP998296          | 23.97 | 33.77 | 29.13 | 13.12 | 1143 | 46.89 | -0.44   | 53.11 | 0.10    | 24.74 | 33.33 | 28.53 | 13.39 | 978  | 46.73 | -0.43   | 53.27 | 0.07    |
| <i>Ficedula albicollis</i> KF293721           | 23.53 | 34.91 | 27.30 | 14.26 | 1143 | 49.17 | -0.42   | 50.83 | 0.07    | 22.80 | 36.20 | 25.36 | 15.64 | 978  | 51.84 | -0.40   | 48.16 | 0.05    |
| <i>Ficedula hyperythra</i> MW795347           | 24.06 | 34.91 | 26.77 | 14.26 | 1143 | 49.17 | -0.42   | 50.83 | 0.05    | 23.82 | 35.38 | 24.54 | 16.26 | 978  | 51.64 | -0.37   | 48.36 | 0.01    |
| <i>Ficedula zanthopygia</i> JN018411          | 23.97 | 34.65 | 28.43 | 12.95 | 1143 | 47.59 | -0.46   | 52.41 | 0.09    | 24.74 | 34.15 | 25.97 | 15.13 | 978  | 49.28 | -0.39   | 50.72 | 0.02    |
| <i>Larivora akahige akahige</i> LC541457      | 24.93 | 33.07 | 28.87 | 13.12 | 1143 | 46.19 | -0.43   | 53.81 | 0.07    | 28.02 | 30.57 | 26.48 | 14.93 | 978  | 45.50 | -0.34   | 54.50 | -0.03   |
| <i>Larivora komadori namiyei</i> LC541462     | 25.28 | 32.28 | 29.66 | 12.77 | 1143 | 45.06 | -0.43   | 54.94 | 0.08    | 27.10 | 30.47 | 28.32 | 14.11 | 978  | 44.58 | -0.37   | 55.42 | 0.02    |
| <i>Melaenornis chocolatinus</i> MT017899      | 23.62 | 34.21 | 28.70 | 13.47 | 1143 | 47.68 | -0.43   | 52.32 | 0.10    | 24.44 | 34.46 | 26.18 | 14.93 | 978  | 49.39 | -0.40   | 50.61 | 0.03    |
| <i>Monticola gularis</i> KX506858             | 24.50 | 34.65 | 27.65 | 13.21 | 1143 | 47.86 | -0.45   | 52.14 | 0.06    | 24.85 | 34.15 | 27.10 | 13.91 | 978  | 48.06 | -0.42   | 51.94 | 0.04    |
| <i>Muscicapa sibirica</i> MK390479            | 23.53 | 35.17 | 28.08 | 13.21 | 1143 | 48.38 | -0.45   | 51.62 | 0.09    | 26.18 | 33.03 | 25.77 | 15.03 | 978  | 48.06 | -0.37   | 51.94 | -0.01   |
| <i>Muscicapa latirostris</i> MK770602         | 24.23 | 34.38 | 28.35 | 13.04 | 1143 | 47.42 | -0.45   | 52.58 | 0.08    | 26.38 | 32.82 | 27.10 | 13.70 | 978  | 46.52 | -0.41   | 53.48 | 0.01    |
| <i>Muscicapa sibirica</i> MK770601            | 24.23 | 34.47 | 28.35 | 12.95 | 1143 | 47.42 | -0.45   | 52.58 | 0.08    | 26.28 | 32.92 | 26.69 | 14.11 | 978  | 47.03 | -0.40   | 52.97 | 0.01    |
| <i>Myophonus caeruleus</i> MN564936           | 24.06 | 34.65 | 27.56 | 13.74 | 1143 | 48.38 | -0.43   | 51.62 | 0.07    | 25.97 | 32.72 | 26.79 | 14.52 | 978  | 47.24 | -0.39   | 52.76 | 0.02    |
| <i>Niltava davidi</i> KY024217                | 23.88 | 34.03 | 28.96 | 13.12 | 1143 | 47.16 | -0.44   | 52.84 | 0.10    | 25.26 | 33.44 | 27.40 | 13.91 | 978  | 47.34 | -0.41   | 52.66 | 0.04    |
| <i>Oenanthe isabellina</i> KU097327           | 23.27 | 35.52 | 28.26 | 12.95 | 1143 | 48.47 | -0.47   | 51.53 | 0.10    | 24.13 | 34.66 | 26.89 | 14.31 | 978  | 48.98 | -0.42   | 51.02 | 0.05    |
| <i>Oenanthe oenanthe</i> MN356231             | 23.97 | 34.65 | 28.26 | 13.12 | 1143 | 47.77 | -0.45   | 52.23 | 0.08    | 24.34 | 34.36 | 27.40 | 13.91 | 978  | 48.26 | -0.42   | 51.74 | 0.06    |
| <i>Phoenicurus aureus</i> KF997863            | 23.53 | 35.43 | 28.00 | 13.04 | 1143 | 48.47 | -0.46   | 51.53 | 0.09    | 25.77 | 33.54 | 26.99 | 13.70 | 978  | 47.24 | -0.42   | 52.76 | 0.02    |
| <i>Phoenicurus frontalis</i> MT360379         | 24.06 | 34.21 | 28.78 | 12.95 | 1143 | 47.16 | -0.45   | 52.84 | 0.09    | 24.54 | 34.15 | 27.71 | 13.60 | 978  | 47.75 | -0.43   | 52.25 | 0.06    |
| <i>Rhinomyias umbratilis</i> ON746672         | 23.36 | 34.56 | 28.17 | 13.91 | 1143 | 48.47 | -0.43   | 51.53 | 0.09    | 24.85 | 33.74 | 25.56 | 15.85 | 978  | 49.59 | -0.36   | 50.41 | 0.01    |
| <i>Tarsiger cyanurus</i> KF997864             | 23.71 | 35.00 | 28.26 | 13.04 | 1143 | 48.03 | -0.46   | 51.97 | 0.09    | 24.64 | 33.64 | 27.71 | 14.01 | 978  | 47.65 | -0.41   | 52.35 | 0.06    |
| <i>Tarsiger indicus</i> OR459825              | 24.06 | 34.82 | 27.82 | 13.30 | 1143 | 48.12 | -0.45   | 51.88 | 0.07    | 24.34 | 34.46 | 26.79 | 14.42 | 978  | 48.88 | -0.41   | 51.12 | 0.05    |
| Avg.                                          | 23.92 | 34.50 | 28.29 | 13.29 | 1143 |       |         |       |         | 25.23 | 33.55 | 26.58 | 14.63 | 978  |       |         |       |         |

|                                               | ND2   |       |       |       |      |       |         |       |         | ND3   |       |       |       |      |       |         |       |         |
|-----------------------------------------------|-------|-------|-------|-------|------|-------|---------|-------|---------|-------|-------|-------|-------|------|-------|---------|-------|---------|
| Species                                       | T(U)  | C     | A     | G     | Size | %GC   | GC-skew | %AT   | AT-skew | T(U)  | C     | A     | G     | Size | %GC   | GC-skew | %AT   | AT-skew |
| <i>Calliope calliope</i> HQ690246             | 23.27 | 35.10 | 29.52 | 12.12 | 1040 | 47.21 | -0.49   | 52.79 | 0.12    | 25.43 | 32.57 | 27.43 | 14.57 | 350  | 47.14 | -0.38   | 52.86 | 0.04    |
| <i>Copsychus saularis</i> KU058637            | 24.71 | 34.52 | 29.04 | 11.73 | 1040 | 46.25 | -0.49   | 53.75 | 0.08    | 24.50 | 34.47 | 27.92 | 13.11 | 351  | 47.58 | -0.45   | 52.42 | 0.07    |
| <i>Copsychus sechellarum</i> MN356447         | 24.33 | 34.71 | 29.04 | 11.92 | 1040 | 46.63 | -0.49   | 53.37 | 0.09    | 25.64 | 33.62 | 28.21 | 12.54 | 351  | 46.15 | -0.46   | 53.85 | 0.05    |
| <i>Cossypha semirufa</i> MT017889             | 24.04 | 33.56 | 30.10 | 12.31 | 1040 | 45.87 | -0.46   | 54.13 | 0.11    | 26.50 | 30.48 | 28.49 | 14.53 | 351  | 45.01 | -0.35   | 54.99 | 0.04    |
| <i>Cyornis hainanus/rubeculoides</i> HQ896033 | 22.60 | 35.29 | 30.58 | 11.54 | 1040 | 46.83 | -0.51   | 53.17 | 0.15    | 25.07 | 32.76 | 28.77 | 13.39 | 351  | 46.15 | -0.42   | 53.85 | 0.07    |
| <i>Cyornis magnirostris</i> ON746663          | 23.37 | 34.42 | 30.96 | 11.25 | 1040 | 45.67 | -0.51   | 54.33 | 0.14    | 24.79 | 33.62 | 29.34 | 12.25 | 351  | 45.87 | -0.47   | 54.13 | 0.08    |
| <i>Enicurus schistaceus</i> OP998296          | 24.69 | 33.91 | 31.41 | 9.99  | 1041 | 43.90 | -0.54   | 56.10 | 0.12    | 25.36 | 32.48 | 29.34 | 12.82 | 351  | 45.30 | -0.43   | 54.70 | 0.07    |
| <i>Ficedula albicollis</i> KF293721           | 22.29 | 36.41 | 29.01 | 12.30 | 1041 | 48.70 | -0.50   | 51.30 | 0.13    | 24.22 | 33.05 | 26.78 | 15.95 | 351  | 49.00 | -0.35   | 51.00 | 0.05    |
| <i>Ficedula hyperythra</i> MW795347           | 22.79 | 35.77 | 28.56 | 12.88 | 1040 | 48.65 | -0.47   | 51.35 | 0.11    | 24.79 | 32.48 | 29.06 | 13.68 | 351  | 46.15 | -0.41   | 53.85 | 0.08    |
| <i>Ficedula zanthopygia</i> JN018411          | 24.71 | 34.33 | 29.52 | 11.44 | 1040 | 45.77 | -0.50   | 54.23 | 0.09    | 25.50 | 32.86 | 28.33 | 13.31 | 353  | 46.18 | -0.42   | 53.82 | 0.05    |
| <i>Larivora akahige akahige</i> LC541457      | 25.36 | 32.47 | 30.36 | 11.82 | 1041 | 44.28 | -0.47   | 55.72 | 0.09    | 24.79 | 34.47 | 26.21 | 14.53 | 351  | 49.00 | -0.41   | 51.00 | 0.03    |
| <i>Larivora komadori namiyei</i> LC541462     | 25.36 | 32.18 | 31.41 | 11.05 | 1041 | 43.23 | -0.49   | 56.77 | 0.11    | 26.21 | 31.62 | 26.78 | 15.38 | 351  | 47.01 | -0.35   | 52.99 | 0.01    |
| <i>Melaenornis chocolatinus</i> MT017899      | 23.37 | 34.90 | 30.10 | 11.63 | 1040 | 46.54 | -0.50   | 53.46 | 0.13    | 25.07 | 33.62 | 28.49 | 12.82 | 351  | 46.44 | -0.45   | 53.56 | 0.06    |
| <i>Monticola gularis</i> KX506858             | 23.17 | 35.29 | 30.67 | 10.87 | 1040 | 46.15 | -0.53   | 53.85 | 0.14    | 27.64 | 31.34 | 26.50 | 14.53 | 351  | 45.87 | -0.37   | 54.13 | -0.02   |
| <i>Muscicapa sibirica</i> MK390479            | 24.33 | 33.56 | 29.71 | 12.40 | 1040 | 45.96 | -0.46   | 54.04 | 0.10    | 24.22 | 34.76 | 27.64 | 13.39 | 351  | 48.15 | -0.44   | 51.85 | 0.07    |
| <i>Muscicapa latirostris</i> MK770602         | 24.62 | 33.85 | 30.58 | 10.96 | 1040 | 44.81 | -0.51   | 55.19 | 0.11    | 25.64 | 33.05 | 28.21 | 13.11 | 351  | 46.15 | -0.43   | 53.85 | 0.05    |
| <i>Muscicapa sibirica</i> MK770601            | 24.13 | 33.85 | 29.81 | 12.21 | 1040 | 46.06 | -0.47   | 53.94 | 0.11    | 24.50 | 34.47 | 27.35 | 13.68 | 351  | 48.15 | -0.43   | 51.85 | 0.05    |
| <i>Myophonus caeruleus</i> MN564936           | 24.33 | 34.13 | 30.67 | 10.87 | 1040 | 45.00 | -0.52   | 55.00 | 0.12    | 25.07 | 32.48 | 27.35 | 15.10 | 351  | 47.58 | -0.37   | 52.42 | 0.04    |
| <i>Niltava davidi</i> KY024217                | 24.81 | 32.12 | 32.31 | 10.77 | 1040 | 42.88 | -0.50   | 57.12 | 0.13    | 25.07 | 33.33 | 30.20 | 11.40 | 351  | 44.73 | -0.49   | 55.27 | 0.09    |
| <i>Oenanthe isabellina</i> KU097327           | 22.21 | 35.87 | 31.06 | 10.87 | 1040 | 46.73 | -0.53   | 53.27 | 0.17    | 24.22 | 35.61 | 28.49 | 11.68 | 351  | 47.29 | -0.51   | 52.71 | 0.08    |
| <i>Oenanthe oenanthe</i> MN356231             | 23.08 | 34.71 | 31.63 | 10.58 | 1040 | 45.29 | -0.53   | 54.71 | 0.16    | 24.22 | 35.04 | 28.21 | 12.54 | 351  | 47.58 | -0.47   | 52.42 | 0.08    |
| <i>Phoenicurus aureus</i> KF997863            | 23.27 | 34.81 | 31.54 | 10.38 | 1040 | 45.19 | -0.54   | 54.81 | 0.15    | 25.07 | 33.62 | 26.78 | 14.53 | 351  | 48.15 | -0.40   | 51.85 | 0.03    |
| <i>Phoenicurus frontalis</i> MT360379         | 25.26 | 33.33 | 30.26 | 11.14 | 1041 | 44.48 | -0.50   | 55.52 | 0.09    | 25.07 | 34.19 | 27.92 | 12.82 | 351  | 47.01 | -0.45   | 52.99 | 0.05    |
| <i>Rhinomyias umbratilis</i> ON746672         | 22.88 | 34.52 | 30.67 | 11.92 | 1040 | 46.44 | -0.49   | 53.56 | 0.15    | 24.79 | 34.19 | 26.78 | 14.25 | 351  | 48.43 | -0.41   | 51.57 | 0.04    |
| <i>Tarsiger cyanurus</i> KF997864             | 22.79 | 35.19 | 31.92 | 10.10 | 1040 | 45.29 | -0.55   | 54.71 | 0.17    | 24.22 | 34.19 | 30.20 | 11.40 | 351  | 45.58 | -0.50   | 54.42 | 0.11    |
| <i>Tarsiger indicus</i> OR459825              | 22.12 | 36.54 | 30.19 | 11.15 | 1040 | 47.69 | -0.53   | 52.31 | 0.15    | 24.50 | 34.19 | 27.64 | 13.68 | 351  | 47.86 | -0.43   | 52.14 | 0.06    |
| Avg.                                          | 23.76 | 34.44 | 30.41 | 11.39 | 1040 |       |         |       |         | 25.08 | 33.41 | 28.02 | 13.50 | 351  |       |         |       |         |

|                                               | ND4   |       |       |       |      |       |         |       |         | ND4L  |       |       |       |      |       |         |       |         |
|-----------------------------------------------|-------|-------|-------|-------|------|-------|---------|-------|---------|-------|-------|-------|-------|------|-------|---------|-------|---------|
| Species                                       | T(U)  | C     | A     | G     | Size | %GC   | GC-skew | %AT   | AT-skew | T(U)  | C     | A     | G     | Size | %GC   | GC-skew | %AT   | AT-skew |
| <i>Calliope calliope</i> HQ690246             | 22.79 | 37.30 | 28.96 | 10.96 | 1378 | 48.26 | -0.55   | 51.74 | 0.12    | 21.89 | 37.04 | 27.27 | 13.80 | 297  | 50.84 | -0.46   | 49.16 | 0.11    |
| <i>Copsychus saularis</i> KU058637            | 22.21 | 37.88 | 29.25 | 10.67 | 1378 | 48.55 | -0.56   | 51.45 | 0.14    | 23.23 | 36.70 | 25.93 | 14.14 | 297  | 50.84 | -0.44   | 49.16 | 0.05    |
| <i>Copsychus sechellarum</i> MN356447         | 22.35 | 37.88 | 28.74 | 11.03 | 1378 | 48.91 | -0.55   | 51.09 | 0.13    | 22.56 | 37.04 | 26.60 | 13.80 | 297  | 50.84 | -0.46   | 49.16 | 0.08    |
| <i>Cossypha semirufa</i> MT017889             | 24.38 | 34.91 | 30.41 | 10.30 | 1378 | 45.21 | -0.54   | 54.79 | 0.11    | 24.92 | 33.67 | 28.28 | 13.13 | 297  | 46.80 | -0.44   | 53.20 | 0.06    |
| <i>Cyornis hainanus/rubeculoides</i> HQ896033 | 22.42 | 35.92 | 29.97 | 11.68 | 1378 | 47.61 | -0.51   | 52.39 | 0.14    | 22.56 | 37.04 | 27.27 | 13.13 | 297  | 50.17 | -0.48   | 49.83 | 0.09    |
| <i>Cyornis magnirostris</i> ON746663          | 22.57 | 35.99 | 29.90 | 11.54 | 1378 | 47.53 | -0.51   | 52.47 | 0.14    | 22.22 | 37.37 | 26.26 | 14.14 | 297  | 51.52 | -0.45   | 48.48 | 0.08    |
| <i>Enicurus schistaceus</i> OP998296          | 22.21 | 36.50 | 30.77 | 10.52 | 1378 | 47.02 | -0.55   | 52.98 | 0.16    | 22.22 | 36.03 | 29.29 | 12.46 | 297  | 48.48 | -0.49   | 51.52 | 0.14    |
| <i>Ficedula albicollis</i> KF293721           | 21.63 | 37.52 | 28.81 | 12.05 | 1378 | 49.56 | -0.51   | 50.44 | 0.14    | 23.23 | 36.70 | 25.59 | 14.48 | 297  | 51.18 | -0.43   | 48.82 | 0.05    |
| <i>Ficedula hyperythra</i> MW795347           | 21.70 | 38.03 | 29.39 | 10.89 | 1378 | 48.91 | -0.55   | 51.09 | 0.15    | 22.56 | 37.04 | 26.94 | 13.47 | 297  | 50.51 | -0.47   | 49.49 | 0.09    |
| <i>Ficedula zanthopygia</i> JN018411          | 22.57 | 37.01 | 29.32 | 11.10 | 1378 | 48.11 | -0.54   | 51.89 | 0.13    | 23.23 | 36.70 | 27.27 | 12.79 | 297  | 49.49 | -0.48   | 50.51 | 0.08    |
| <i>Larivora akahige akahige</i> LC541457      | 23.32 | 35.38 | 30.12 | 11.18 | 1368 | 46.56 | -0.52   | 53.44 | 0.13    | 23.23 | 36.36 | 27.95 | 12.46 | 297  | 48.82 | -0.49   | 51.18 | 0.09    |
| <i>Larivora komadori namiyei</i> LC541462     | 23.54 | 34.94 | 30.19 | 11.33 | 1368 | 46.27 | -0.51   | 53.73 | 0.12    | 23.91 | 35.69 | 28.96 | 11.45 | 297  | 47.14 | -0.51   | 52.86 | 0.10    |
| <i>Melaenornis chocolatinus</i> MT017899      | 22.50 | 37.08 | 30.12 | 10.30 | 1378 | 47.39 | -0.57   | 52.61 | 0.14    | 23.57 | 35.69 | 25.93 | 14.81 | 297  | 50.51 | -0.41   | 49.49 | 0.05    |
| <i>Monticola gularis</i> KX506858             | 22.79 | 36.72 | 29.61 | 10.89 | 1378 | 47.61 | -0.54   | 52.39 | 0.13    | 24.58 | 35.02 | 28.96 | 11.45 | 297  | 46.46 | -0.51   | 53.54 | 0.08    |
| <i>Muscicapa sibirica</i> MK390479            | 22.93 | 36.79 | 29.68 | 10.60 | 1378 | 47.39 | -0.55   | 52.61 | 0.13    | 23.23 | 36.70 | 26.26 | 13.80 | 297  | 50.51 | -0.45   | 49.49 | 0.06    |
| <i>Muscicapa latirostris</i> MK770602         | 23.08 | 37.01 | 28.88 | 11.03 | 1378 | 48.04 | -0.54   | 51.96 | 0.11    | 23.23 | 36.70 | 26.60 | 13.47 | 297  | 50.17 | -0.46   | 49.83 | 0.07    |
| <i>Muscicapa sibirica</i> MK770601            | 22.71 | 36.87 | 29.68 | 10.74 | 1378 | 47.61 | -0.55   | 52.39 | 0.13    | 22.90 | 36.70 | 27.27 | 13.13 | 297  | 49.83 | -0.47   | 50.17 | 0.09    |
| <i>Myophonus caeruleus</i> MN564936           | 22.42 | 36.21 | 30.19 | 11.18 | 1378 | 47.39 | -0.53   | 52.61 | 0.15    | 23.91 | 35.35 | 29.29 | 11.45 | 297  | 46.80 | -0.51   | 53.20 | 0.10    |
| <i>Niltava davidi</i> KY024217                | 23.00 | 34.69 | 30.84 | 11.47 | 1378 | 46.15 | -0.50   | 53.85 | 0.15    | 24.92 | 34.34 | 27.95 | 12.79 | 297  | 47.14 | -0.46   | 52.86 | 0.06    |
| <i>Oenanthe isabellina</i> KU097327           | 22.13 | 37.52 | 29.61 | 10.74 | 1378 | 48.26 | -0.55   | 51.74 | 0.14    | 21.55 | 37.71 | 26.60 | 14.14 | 297  | 51.85 | -0.45   | 48.15 | 0.10    |
| <i>Oenanthe oenanthe</i> MN356231             | 21.92 | 37.45 | 30.12 | 10.52 | 1378 | 47.97 | -0.56   | 52.03 | 0.16    | 22.90 | 36.03 | 27.61 | 13.47 | 297  | 49.49 | -0.46   | 50.51 | 0.09    |
| <i>Phoenicurus aureus</i> KF997863            | 22.42 | 36.72 | 30.19 | 10.67 | 1378 | 47.39 | -0.55   | 52.61 | 0.15    | 22.90 | 36.36 | 27.95 | 12.79 | 297  | 49.16 | -0.48   | 50.84 | 0.10    |
| <i>Phoenicurus frontalis</i> MT360379         | 22.86 | 36.14 | 30.48 | 10.52 | 1378 | 46.66 | -0.55   | 53.34 | 0.14    | 22.90 | 36.36 | 26.94 | 13.80 | 297  | 50.17 | -0.45   | 49.83 | 0.08    |
| <i>Rhinomyias umbratilis</i> ON746672         | 22.93 | 35.70 | 29.68 | 11.68 | 1378 | 47.39 | -0.51   | 52.61 | 0.13    | 22.22 | 36.70 | 27.95 | 13.13 | 297  | 49.83 | -0.47   | 50.17 | 0.11    |
| <i>Tarsiger cyanurus</i> KF997864             | 22.79 | 36.72 | 29.75 | 10.74 | 1378 | 47.46 | -0.55   | 52.54 | 0.13    | 23.23 | 35.69 | 27.27 | 13.80 | 297  | 49.49 | -0.44   | 50.51 | 0.08    |
| <i>Tarsiger indicus</i> OR459825              | 21.70 | 37.30 | 29.97 | 11.03 | 1378 | 48.33 | -0.54   | 51.67 | 0.16    | 22.22 | 36.70 | 26.94 | 14.14 | 297  | 50.84 | -0.44   | 49.16 | 0.10    |
| Avg.                                          | 22.61 | 36.62 | 29.79 | 10.98 | 1377 |       |         |       |         | 23.08 | 36.29 | 27.35 | 13.29 | 297  |       |         |       |         |

| Species                                       | ND5   |       |       |       |      |       |         |       |         | ND6   |       |       |       |      |       |         |       |         |
|-----------------------------------------------|-------|-------|-------|-------|------|-------|---------|-------|---------|-------|-------|-------|-------|------|-------|---------|-------|---------|
|                                               | T(U)  | C     | A     | G     | Size | %GC   | GC-skew | %AT   | AT-skew | T(U)  | C     | A     | G     | Size | %GC   | GC-skew | %AT   | AT-skew |
| <i>Calliope calliope</i> HQ690246             | 22.06 | 36.03 | 29.87 | 12.05 | 1818 | 48.07 | -0.50   | 51.93 | 0.15    | 37.76 | 10.98 | 10.21 | 41.04 | 519  | 52.02 | 0.58    | 47.98 | -0.57   |
| <i>Copsychus saularis</i> KU058637            | 22.77 | 35.70 | 29.76 | 11.77 | 1818 | 47.47 | -0.50   | 52.53 | 0.13    | 38.57 | 10.47 | 10.08 | 40.89 | 516  | 51.36 | 0.59    | 48.64 | -0.59   |
| <i>Copsychus sechellarum</i> MN356447         | 22.77 | 35.64 | 29.70 | 11.88 | 1818 | 47.52 | -0.50   | 52.48 | 0.13    | 38.57 | 10.47 | 11.05 | 39.92 | 516  | 50.39 | 0.58    | 49.61 | -0.55   |
| <i>Cossypha semirufa</i> MT017889             | 24.59 | 33.06 | 30.47 | 11.88 | 1818 | 44.94 | -0.47   | 55.06 | 0.11    | 35.84 | 13.49 | 11.18 | 39.50 | 519  | 52.99 | 0.49    | 47.01 | -0.52   |
| <i>Cyornis hainanus/rubeculoides</i> HQ896033 | 22.88 | 34.38 | 30.86 | 11.88 | 1818 | 46.26 | -0.49   | 53.74 | 0.15    | 38.34 | 10.98 | 10.60 | 40.08 | 519  | 51.06 | 0.57    | 48.94 | -0.57   |
| <i>Cyornis magnirostris</i> ON746663          | 22.55 | 34.82 | 31.13 | 11.50 | 1818 | 46.31 | -0.50   | 53.69 | 0.16    | 38.34 | 11.18 | 11.56 | 38.92 | 519  | 50.10 | 0.55    | 49.90 | -0.54   |
| <i>Enicurus schistaceus</i> OP998296          | 22.33 | 35.15 | 31.85 | 10.67 | 1818 | 45.82 | -0.53   | 54.18 | 0.18    | 39.31 | 10.79 | 10.40 | 39.50 | 519  | 50.29 | 0.57    | 49.71 | -0.58   |
| <i>Ficedula albicollis</i> KF293721           | 22.28 | 36.08 | 29.26 | 12.38 | 1818 | 48.46 | -0.49   | 51.54 | 0.14    | 37.38 | 12.14 | 10.21 | 40.27 | 519  | 52.41 | 0.54    | 47.59 | -0.57   |
| <i>Ficedula hyperythra</i> MW795347           | 21.25 | 37.01 | 30.15 | 11.59 | 1821 | 48.60 | -0.52   | 51.40 | 0.17    | 38.54 | 10.98 | 9.06  | 41.43 | 519  | 52.41 | 0.58    | 47.59 | -0.62   |
| <i>Ficedula zanthopygia</i> JN018411          | 22.99 | 34.87 | 30.47 | 11.66 | 1818 | 46.53 | -0.50   | 53.47 | 0.14    | 38.34 | 10.60 | 11.56 | 39.50 | 519  | 50.10 | 0.58    | 49.90 | -0.54   |
| <i>Larivora akahige akahige</i> LC541457      | 23.93 | 33.72 | 31.24 | 11.11 | 1818 | 44.83 | -0.50   | 55.17 | 0.13    | 38.15 | 10.79 | 11.75 | 39.31 | 519  | 50.10 | 0.57    | 49.90 | -0.53   |
| <i>Larivora komadori namiyei</i> LC541462     | 23.93 | 33.00 | 31.79 | 11.28 | 1818 | 44.28 | -0.49   | 55.72 | 0.14    | 38.54 | 10.98 | 11.75 | 38.73 | 519  | 49.71 | 0.56    | 50.29 | -0.53   |
| <i>Melaenornis chocolatinus</i> MT017899      | 22.66 | 34.54 | 31.74 | 11.06 | 1818 | 45.60 | -0.52   | 54.40 | 0.17    | 39.50 | 9.25  | 10.40 | 40.85 | 519  | 50.10 | 0.63    | 49.90 | -0.58   |
| <i>Monticola gularis</i> KX506858             | 23.10 | 35.59 | 30.14 | 11.17 | 1818 | 46.75 | -0.52   | 53.25 | 0.13    | 38.92 | 10.98 | 11.56 | 38.54 | 519  | 49.52 | 0.56    | 50.48 | -0.54   |
| <i>Muscicapa sibirica</i> MK390479            | 22.72 | 34.93 | 30.42 | 11.94 | 1818 | 46.86 | -0.49   | 53.14 | 0.14    | 38.15 | 10.98 | 11.18 | 39.69 | 519  | 50.67 | 0.57    | 49.33 | -0.55   |
| <i>Muscicapa latirostris</i> MK770602         | 23.82 | 34.32 | 30.31 | 11.55 | 1818 | 45.87 | -0.50   | 54.13 | 0.12    | 39.88 | 10.02 | 11.18 | 38.92 | 519  | 48.94 | 0.59    | 51.06 | -0.56   |
| <i>Muscicapa sibirica</i> MK770601            | 22.72 | 35.04 | 30.47 | 11.77 | 1818 | 46.81 | -0.50   | 53.19 | 0.15    | 37.76 | 11.37 | 11.75 | 39.11 | 519  | 50.48 | 0.55    | 49.52 | -0.53   |
| <i>Myophonus caeruleus</i> MN564936           | 22.99 | 34.21 | 31.08 | 11.72 | 1818 | 45.93 | -0.49   | 54.07 | 0.15    | 37.76 | 11.56 | 10.79 | 39.88 | 519  | 51.45 | 0.55    | 48.55 | -0.56   |
| <i>Niltava davidi</i> KY024217                | 23.27 | 34.10 | 31.24 | 11.39 | 1818 | 45.49 | -0.50   | 54.51 | 0.15    | 38.73 | 9.83  | 10.79 | 40.66 | 519  | 50.48 | 0.61    | 49.52 | -0.56   |
| <i>Oenanthe isabellina</i> KU097327           | 21.84 | 36.08 | 30.97 | 11.11 | 1818 | 47.19 | -0.53   | 52.81 | 0.17    | 38.73 | 10.79 | 10.79 | 39.69 | 519  | 50.48 | 0.57    | 49.52 | -0.56   |
| <i>Oenanthe oenanthe</i> MN356231             | 22.66 | 35.42 | 30.69 | 11.22 | 1818 | 46.64 | -0.52   | 53.36 | 0.15    | 38.42 | 10.42 | 10.04 | 41.12 | 518  | 51.54 | 0.60    | 48.46 | -0.59   |
| <i>Phoenicurus aureus</i> KF997863            | 22.00 | 36.30 | 30.31 | 11.39 | 1818 | 47.69 | -0.52   | 52.31 | 0.16    | 36.99 | 11.75 | 11.37 | 39.88 | 519  | 51.64 | 0.54    | 48.36 | -0.53   |
| <i>Phoenicurus frontalis</i> MT360379         | 22.66 | 35.59 | 30.47 | 11.28 | 1818 | 46.86 | -0.52   | 53.14 | 0.15    | 40.08 | 9.83  | 10.21 | 39.88 | 519  | 49.71 | 0.60    | 50.29 | -0.59   |
| <i>Rhinomyias umbratilis</i> ON746672         | 23.32 | 33.99 | 30.53 | 12.16 | 1818 | 46.15 | -0.47   | 53.85 | 0.13    | 37.57 | 10.79 | 10.98 | 40.66 | 519  | 51.45 | 0.58    | 48.55 | -0.55   |
| <i>Tarsiger cyanurus</i> KF997864             | 22.44 | 35.64 | 30.69 | 11.22 | 1818 | 46.86 | -0.52   | 53.14 | 0.16    | 36.99 | 11.18 | 10.02 | 41.81 | 519  | 52.99 | 0.58    | 47.01 | -0.57   |
| <i>Tarsiger indicus</i> OR459825              | 21.45 | 36.96 | 30.20 | 11.39 | 1818 | 48.35 | -0.53   | 51.65 | 0.17    | 37.76 | 10.98 | 11.37 | 39.88 | 519  | 50.87 | 0.57    | 49.13 | -0.54   |
| Avg.                                          | 22.77 | 35.08 | 30.61 | 11.54 | 1818 |       |         |       |         | 38.27 | 10.91 | 10.84 | 39.99 | 519  |       |         |       |         |

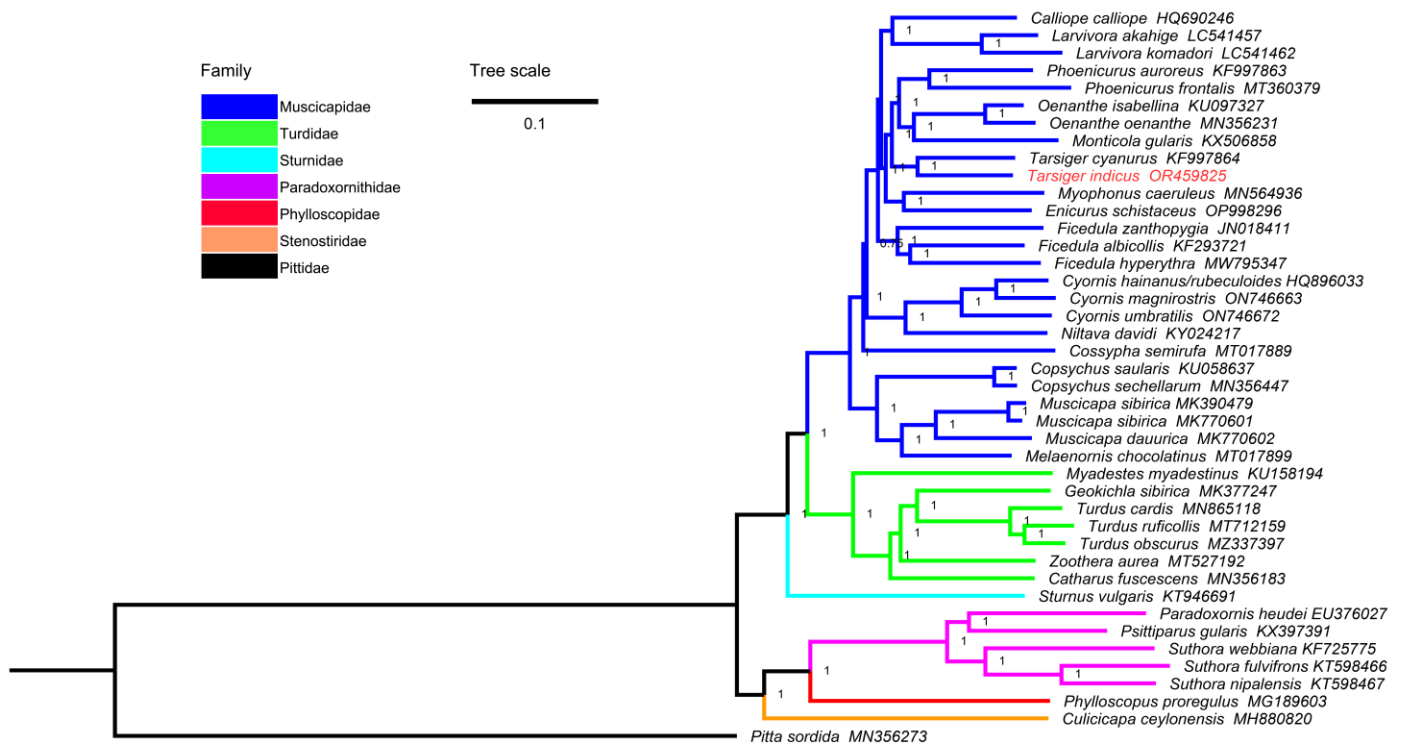

**Figure S1.** The phylogenetic relationships of Passeriformes inferred by BI method based on the 13PCGs+2rRNAs dataset. Numbers on nodes are the Bayesian posterior probabilities.
